# Supplementary material for: Hydrodynamics and Salinity of the Caspian Sea Under Future Climate Change
Source: Research Square preprint supplement (doi:10.21203/rs.3.rs-8360143/v1), 2025-12-30
Supplement: Supplementary file 1 [file 1bc35821a97fffd0bf3970d0.docx]

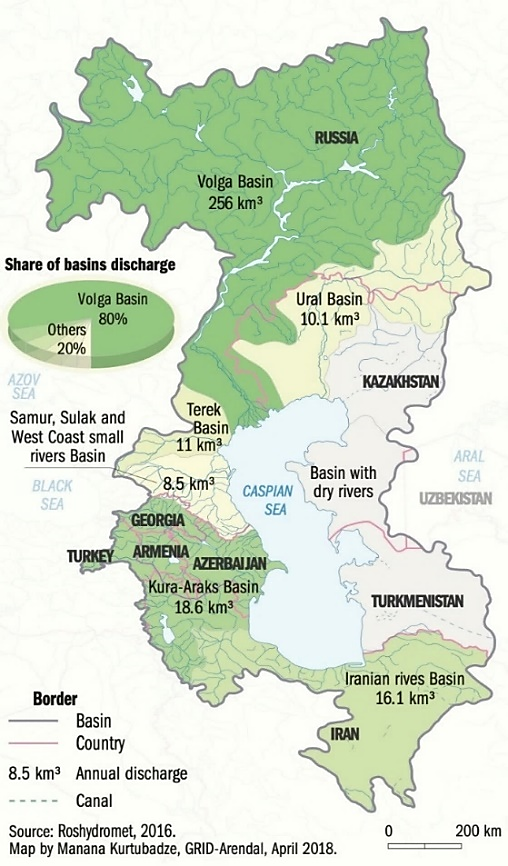


**Supplementary Figure S1.** Major river basins draining into the Caspian Sea and their annual discharge (km³ yr⁻¹), based on Roshydromet data23.

|  |
| --- |

**Supplementary Figure S2.** Flowchart of the Research Workflow

| 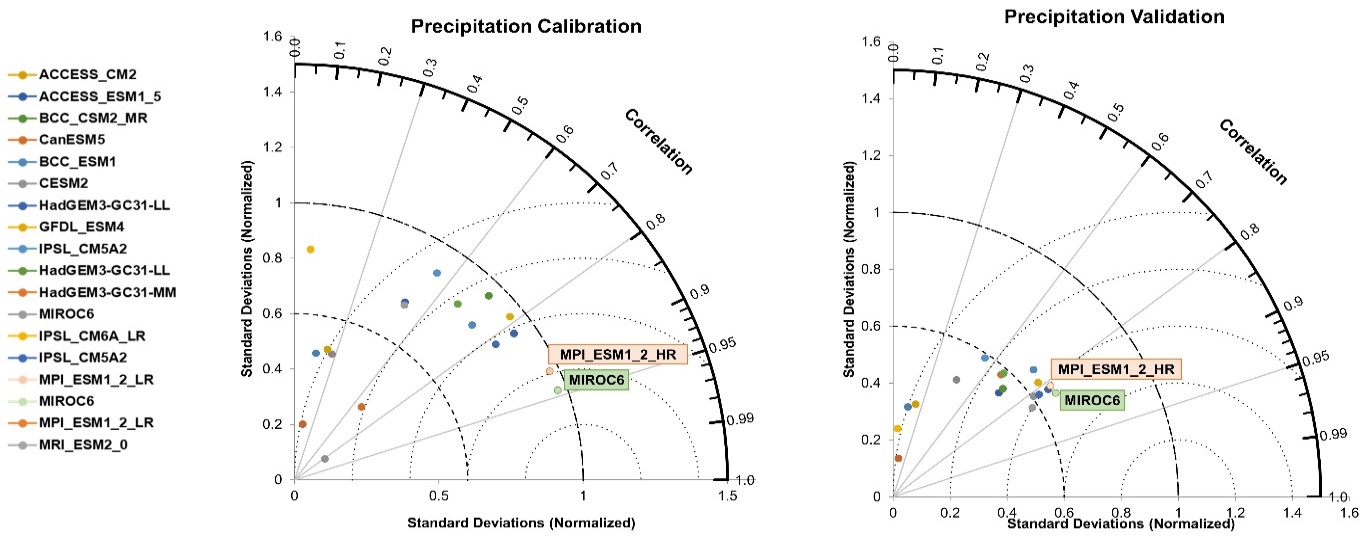  **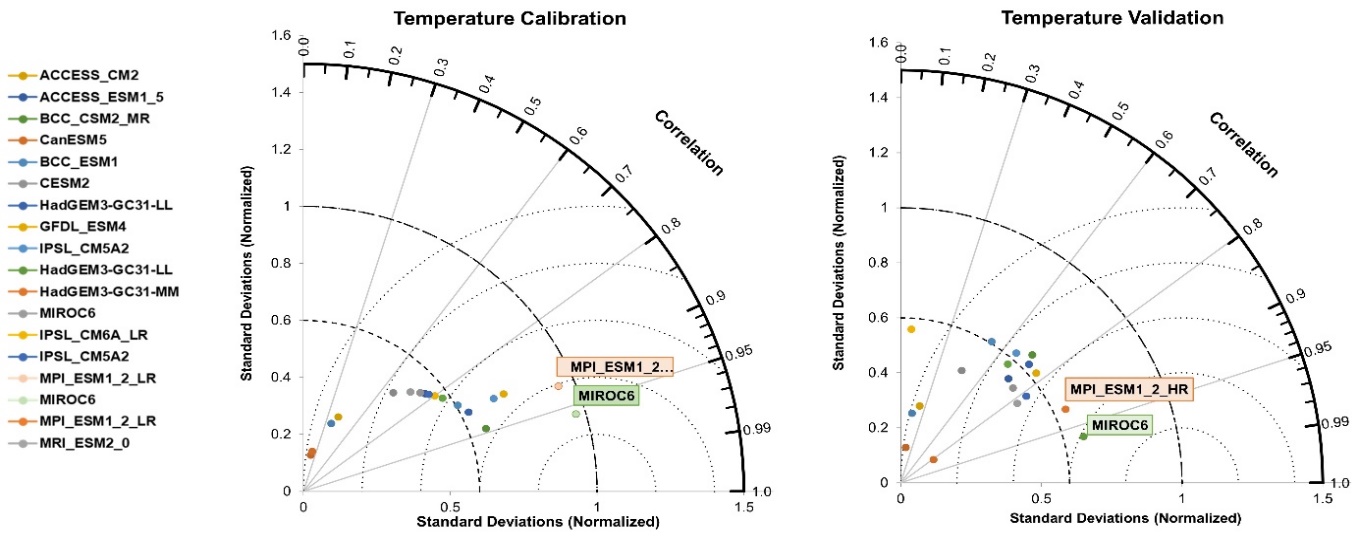**  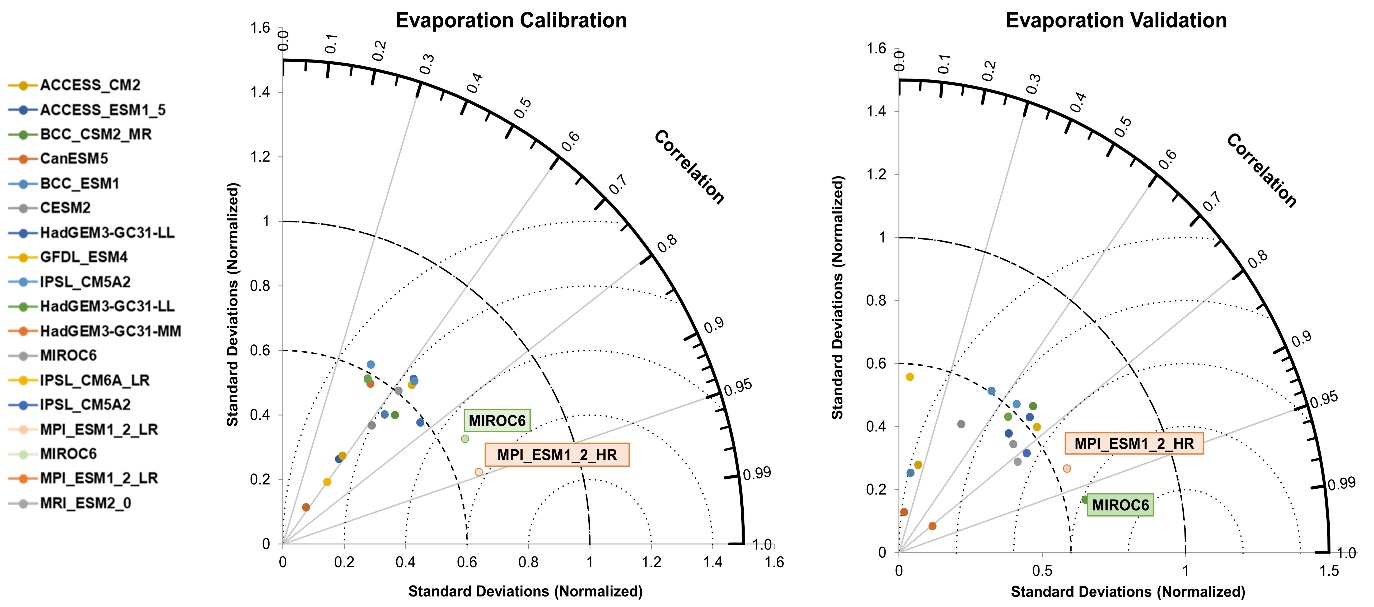 |
| --- |

**Supplementary Figure S3.** Estimated correlation coefficients between climate models and observations for precipitation, evaporation, and temperature

|  |
| --- |

**Supplementary Figure S4.** Schematic Diagram of Delft3D Model Inputs and Applied Coefficients


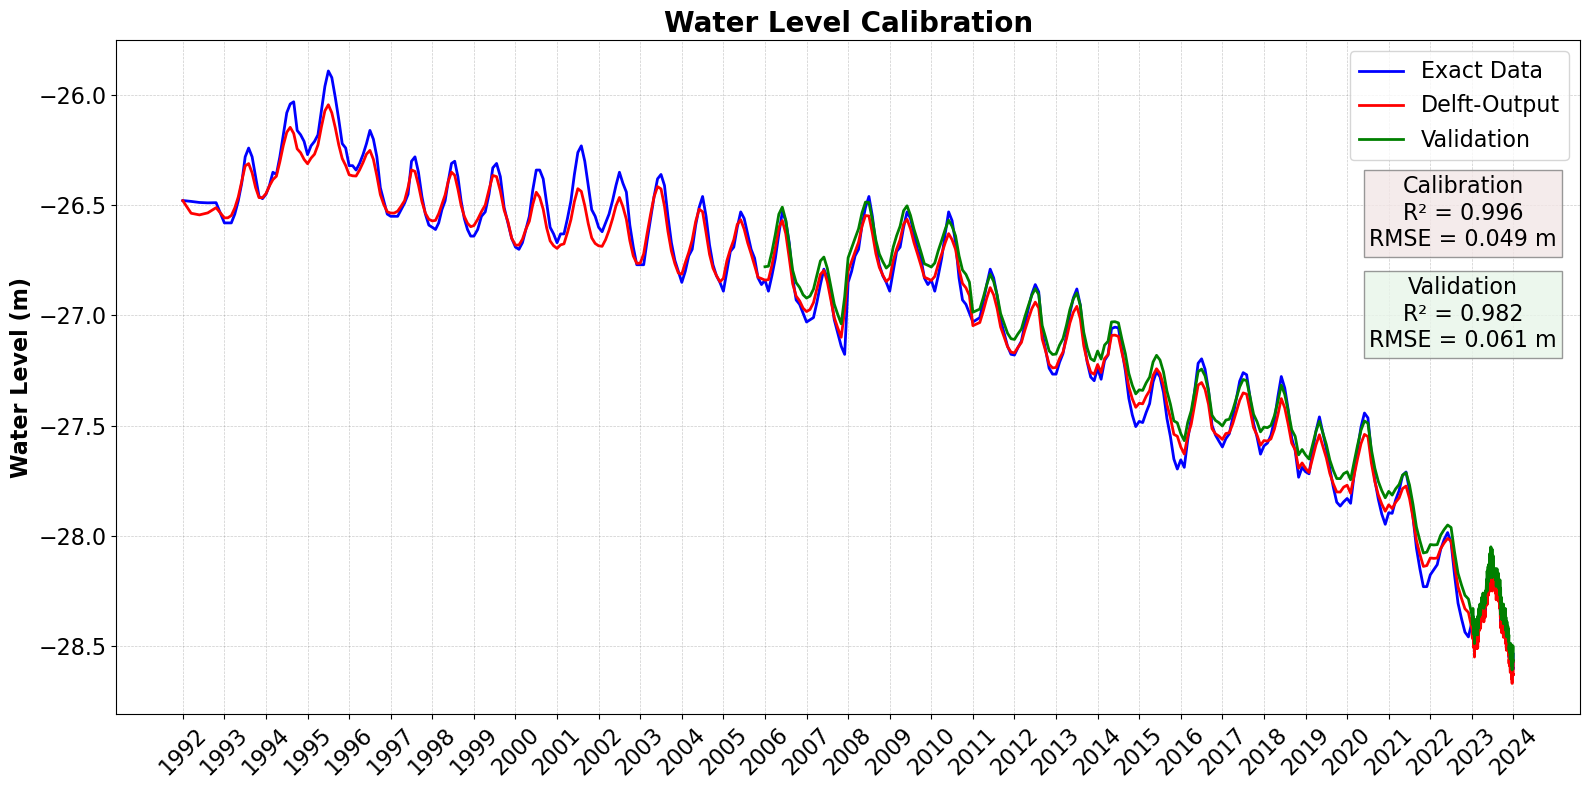


**Supplementary Figure S5.** Calibration & Validation of Caspian Sea Water Level Variations (Monthly Mean Sea Level Changes vs. Satellite Altimetry Data from 1992 to 2022, provided by <https://cds.climate.copernicus.eu/dataset/satellite-lake-water-level>**)**

| 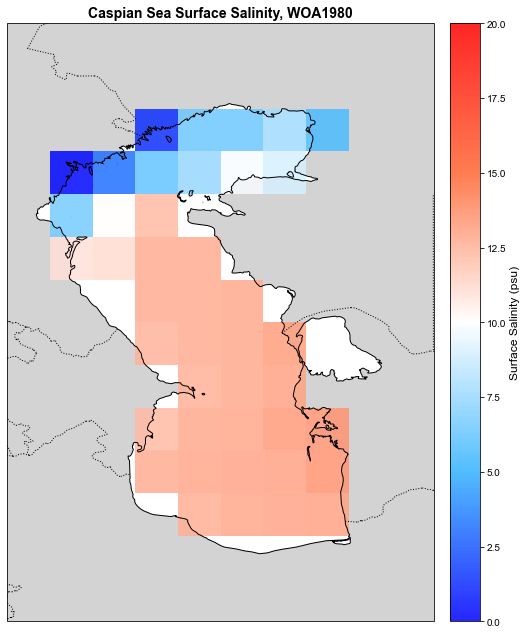 | **Caspian Sea Surface Salinity, Delft3D Model**  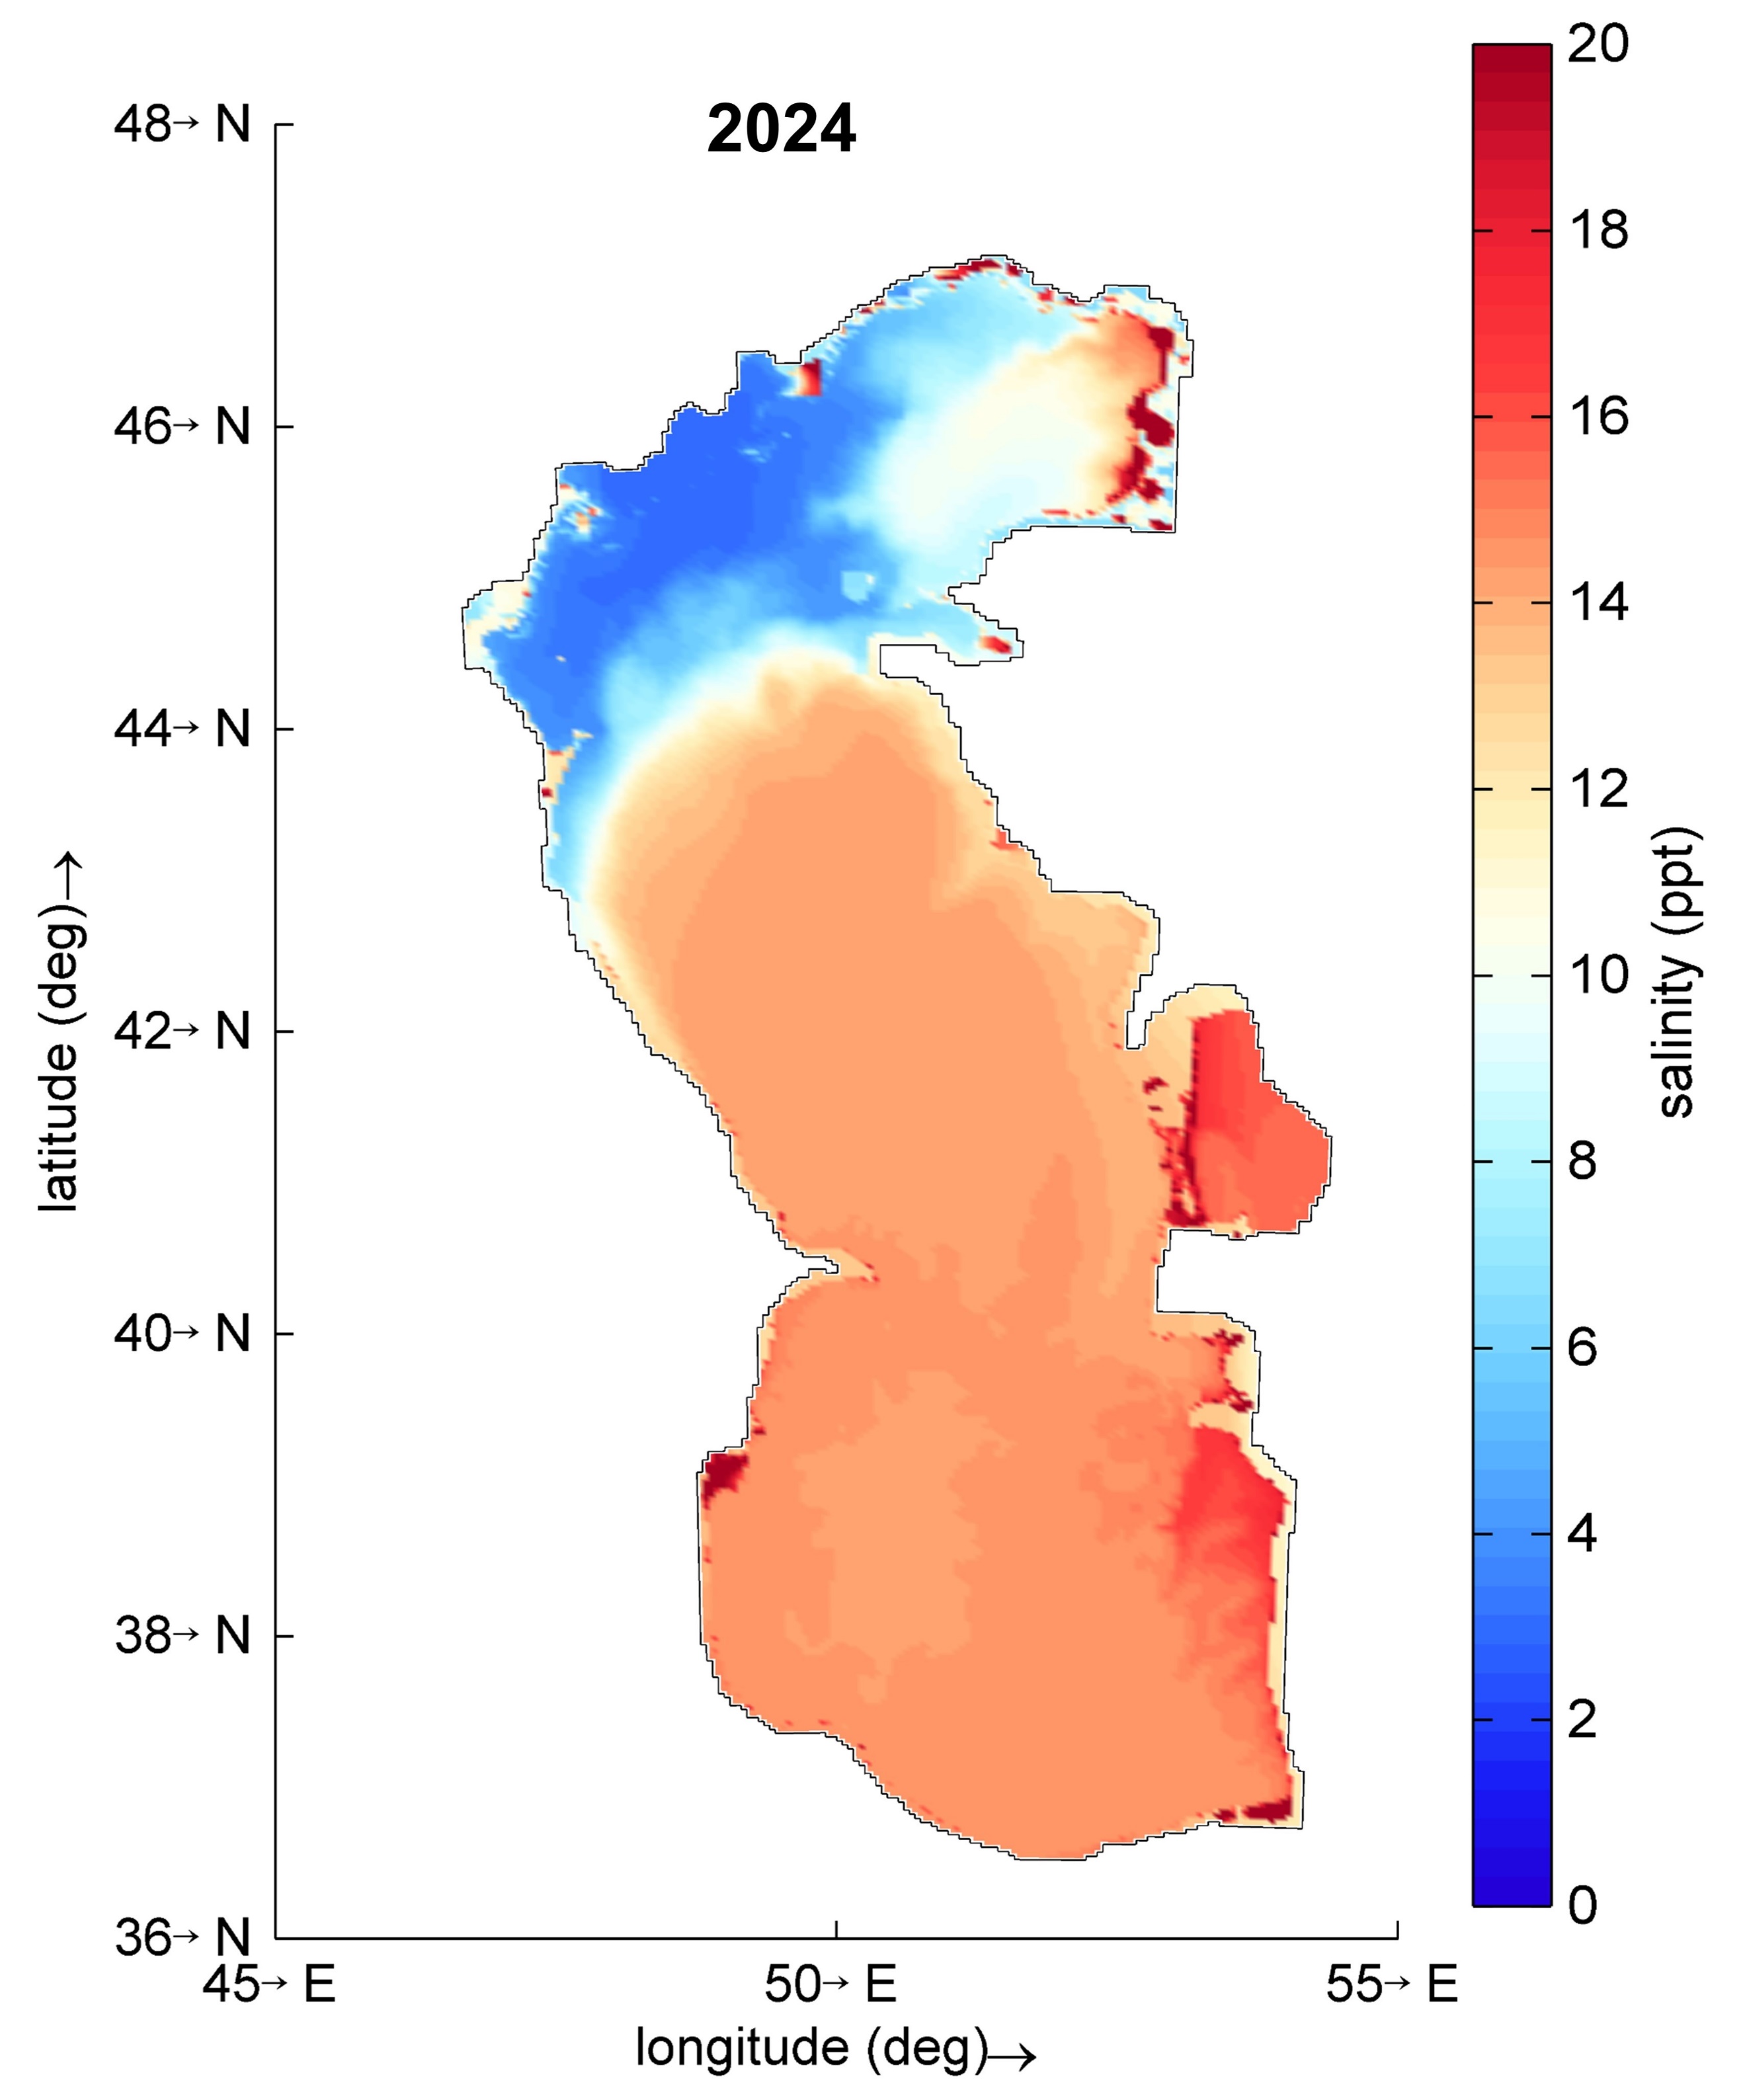 |
| --- | --- |

**Supplementary Figure S6.** Surface salinity calibration. The simulated salinity distribution was compared with WOA1980 and reproduced using Delft3D2024, showing lowest salinity in the north, moderate in the center, and highest in the south.

**Supplementary Figure S8.** Monthly Mean River Discharge to the Caspian Sea

**Supplementary Figure S9.** Seasonal Mean River Discharge to the Caspian Sea

**Supplementary Tabel S1.** List of CMIP6 models used in this study, along with horizontal resolution and country of origin

| **Models** | **Institution** | | **Resolution** |
| --- | --- | --- | --- |
| **ACCESS-CM2**29  **ACCESS-ESM1-5**29 | Commonwealth Scientific and Industrial Research Organization, Australia | 1.25° ×1.875° | |
| **BCC-CSM2-MR**30  **BCC-ESM1**31 | Beijing Climate Center, China Meteorological Administration, China | 1.125° ×1.125° | |
| **CanESM5**32 | Canadian Centre for Climate Modelling and Analysis, Canada | 2.8° ×2.8° | |
| **GFDL-CM4**33  **GFDL-ESM4**33 | NOAA Geophysical Fluid Dynamics Laboratory, USA | 1° ×1.25° | |
| **HadGEM3-GC31-LL**34 **HadGEM3-GC31-MM**34 | Met Office Hadley Centre, UK | 1.25° ×1.875° | |
| **IPSL-CM6A-LR**35 **IPSL-CM5A2**35 | Institute Pierre-Simon Laplace (IPSL), France | 1.26° ×2.5° | |
| **MIROC6**36 | University of Tokyo and the Japan Agency for Marine-Earth Science and Technology (JAMSTEC), Japan | 1.4° ×1.4° | |
| **MIROC-ES2L**37 | National Institute for Environmental Studies and RIKEN Center for Computational Science, Japan | 2.8° ×2.8° | |
| **MPI-ESM-1-2-HR**38  **MPI-ESM-1-2-LR**38 | Max Planck Institute for Meteorology, Germany | 0.9375° ×0.9375° | |
| 1.875° ×1.875° | |
| **MRI-ESM2-0**39 | Meteorological Research Institute, Japan | 1.125° ×1.125° | |
| **NorESM2-LM**40  **NorESM2-MM**40 | Norwegian Climate Prediction Model (NorCPM), Norway | 1.875° ×2.5°  0.9375° ×1.25° | |

| **Supplementary Table S2.** Description of Observational Data: Monthly Water Volume (km³) | | | | | | | | | |
| --- | --- | --- | --- | --- | --- | --- | --- | --- | --- |
| **Hazar** | **Chaloos** | **Polrud** | **sefidrud** | **Sulak** | **Terek** | **Kura** | **Ural** | **Volga** | **Rivers** |
| 36°17'N 52°22'E | 36°31'N 51°20'E | 36°60'N  50°18'E | 37°17'N 49°56'E | - | - | - | 47°41'N  51°35'E | 46°45'N  47°48'E | **Coordinate** |
| Kore Sang | Pole Zoghal | Toolkit | Pole Astane | - | - | - | Makhambet village | V. Lebyazhe | **Post** |
| 1960 | 1960 | 1960 | 1960 | 1980 | 1980 | 1950 | 1938 | 1938 | **Launch date** |
